# Supplementary material for: Recovery of Coastal Fauna after the 2011 Tsunami in Japan as Determined by Bimonthly Underwater Visual Censuses Conducted over Five Years
Source: PLoS One. 2016 Dec 12;11(12):e0168261. doi: 10.1371/journal.pone.0168261 (PMC5152922; doi:10.1371/journal.pone.0168261)
Supplement: S1 Table — Lowercase letters represent significant differences in mean body length among years. (XLS) [file pone.0168261.s001.xls]

## Sheet: Sheet1
	Species				1st year						2nd year						3rd year						4th year						5th year
				Body length (mm)						Body length (mm)						Body length (mm)						Body length (mm)						Body length (mm)
		Ind.	Mean		Min	Max		Ind.	Mean		Min	Max		Ind.	Mean		Min	Max		Ind.	Mean		Min	Max		Ind.	Mean		Min	Max
	Engraulis japonicus	0						100	4		4	4		0						200	4		4	4		0
	Tribolodon hakonensis	0						0						0						0						20	8		8	8
	Aulichthys japonicus	0						0						200	6		6	6		0						0
	Mugil cephalus	155	16.75		7	35		0						0						0						0
	Sebastes schlegelii	2	7.75		1.5	14		1	12		12	12		0						0						11	13.3333		10	15
	Sebastes cheni	2	10		9	11		31	6.8		3	11		168	7.07917		3	15		382	13.1947		12	15		0
	Sebastes vulpes	0						2	22.5		20	25		2	16		16	16		0						4	17.1667		14	21
	Hypodytes rubripinnis	0						0						0						1	2.5		2.5	2.5		0
	Trachurus japonicus	100	15		15	15		0						20	8		8	8		0						150	9		8	10
	Acanthopagrus schlegelii	20	5		5	5		0						0						0						0
	Upeneus japonicus	4	6		5	7		3	5.83333		4	7		0						1	7		7	7		0
	Parupeneus multifasciatus	0						1	4		4	4		0						0						0
	Parupeneus barberinus	0						0						1	3		3	3		0						0	7		7	7
	Neoditrema ransonnetii	180	7.67308		2	14		465	8.54516		5	15		830	9.84242		5	15		824	9.595		3	20		571	7.97143		4	13
	Girella punctata	35	7		6	8		158	8.76		7	10		25	7		6	6		0						251	7.4		6	10
	Semicossyphus reticulatus	1	4		4	4		2	4		4	4		7	8.16667		4	13		0						0
	Parajulis poecileptera	0						1	4		4	4		0						0						1	6		6	6
	Halichoeres tenuispinis	0						32	3.3625		2	5		0						0						0				0
	Hexagrammos agrammus	0						1	20		20	20		0						0						96	12		12	12
	Hexagrammos otakii	83	9.18	c	2	20		89	13.6442	bc	4	40		101	18.8967	ab	8	40		103	17.99	ab	7	40		1	19.8984	a	6	40
	Myoxocephalus polyacanthocephalus	0						0						0						0	16		16	16		0
	Myoxocephalus stelleri	0						1	5		5	5		0						0						0
	Alcichthys elongatus	1	8		8	8		0						0						0						3	14		9	20
	Furcina ishikawae	0						0						1	4		4	4		1	5		5	5		2	5.5		5	6
	Pseudoblennius cottoides	65	3.508		2	7		147	5.21579		1	12		164	5.23676		2	13		75	5.45		3	9		184	5.18415		2	15
	Chirolophis japonicus	0						0						0						1	40		40	40		0
	Opisthocentrus tenuis	0						0	5.37429		3	10		15	8.00833		3	17		349	6.0425		2	16		229	7.10357		3	13
	Pholis crassispina	7	9.83333		8	14		526	11		10	12		2	13.5		13	14		5	8.5		7	10		4	12.3333		9	16
	Plagiotremus rhinorhynchos	0						1	5		5	5		0						0						0
	Repomucenus valenciennei	0						1	4		4	4		0						0						0
	Repomucenus curvicornis	0						1	6		6	6		0						0						0
	Repomucenus ornatipinnis	0						0						3	5.25		3	8		0						2	8.5		7	10
	Amblychaeturichthys sciistius	0						0						0						1	4		4	4		0
	Sagamia geneionema	0						0						1	8		8	8		0						4	6.25		5	8
	Pterogobius zacalles	532	7.97344	b	2	12		191	9.476	a	5	13		297	7.35763	b	3	13		475	7.90147	b	2	13		546	9.38333	a	5	13
	Pterogobius elapoides	7242	3.60392	a	2	7		11181	2.92439	b	1	8		3201	3.55161	a	1	7		1864	3.40222	ab	2	6		1832	4.08723	ab	1.5	10
	Acanthogobius flavimanus	0						0						0						2	10		5	15		3	10.6667		9	12
	Acanthogobius lactipes	10	3		3	3		2	12		12	12		0						1	8		8	8		1	14		14	14
	Tridentiger trigonocephalus	11	2.775		2	4		30	3.72632		2	6		60	3.91481		1	6		7	4.61667		4	6		2	4		4	4
	Acentrogobius virgatulus	20	3.37059	b	2	6		340	4.24316	b	1	7		200	4.688	ab	3	8		313	4.94125	a	2	8		218	4.86125	ab	2	7
	Favonigobius gymnauchen	1	2.5		2.5	2.5		0						0						0						0
	Gymnogobius heptacanthus	542	3.94706		1	5		236	4.23929		3	6		1597	3.83793		3	5		2686	3.68627		2	5		4069	3.18302		2	4
	Platichthys stellatus	0						0						0						1	23		23	23		0
	Pleuronectes yokohamae	1	12		12	12		14	9.45455		1.5	35		8	26.1429		5	38		6	11.5		2	35		9	20		3	40
	Rudarius ercodes	11	1.46667		1	2		0						3	2.66667		2	3		1	2		2	2		3	2.83333		2.5	3
	Paramonacanthus oblongus	1	5		5	5		0						0						0						0
	Takifugu pardalis	0						1	2		2	2		0						0						2	8		8	8
	Takifugu snyderi	0						0						0						0						2	11		8	14
	Takifugu poecilonotus	1	4		4	4		15	3.72727		2	5		24	8.2		3	28		1	4		4	4		24	2.22		1.5	5
	Takifugu niphobles	0						0						3	6		6	6		0						6	8.925		2	13
